# Supplementary material for: SOD1-ALS-Browser: a web-utility for investigating the clinical phenotype in SOD1 amyotrophic lateral sclerosis
Source: bioRxiv or medRxiv preprint supplement (doi:10.1101/2023.03.03.23286719), 2023-03-05

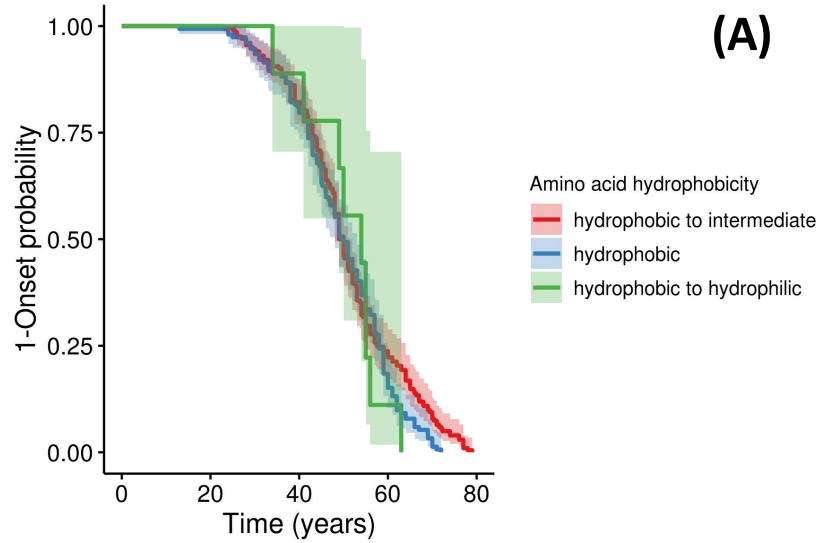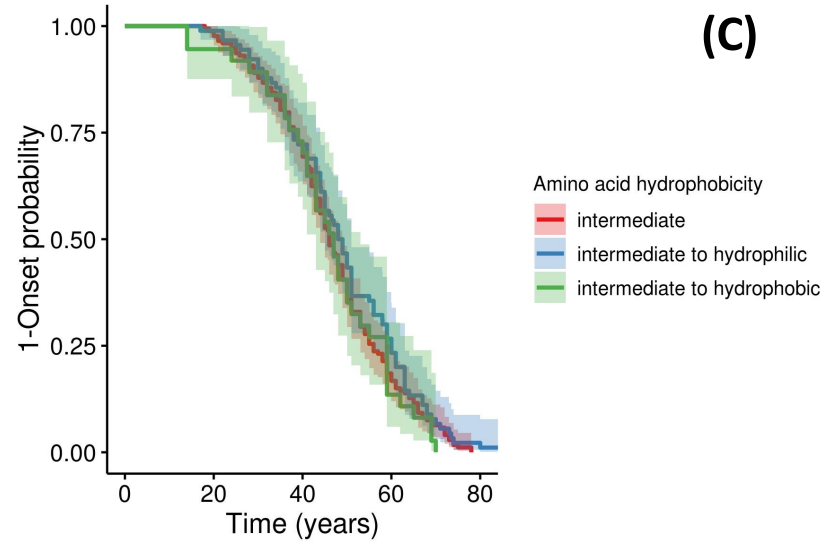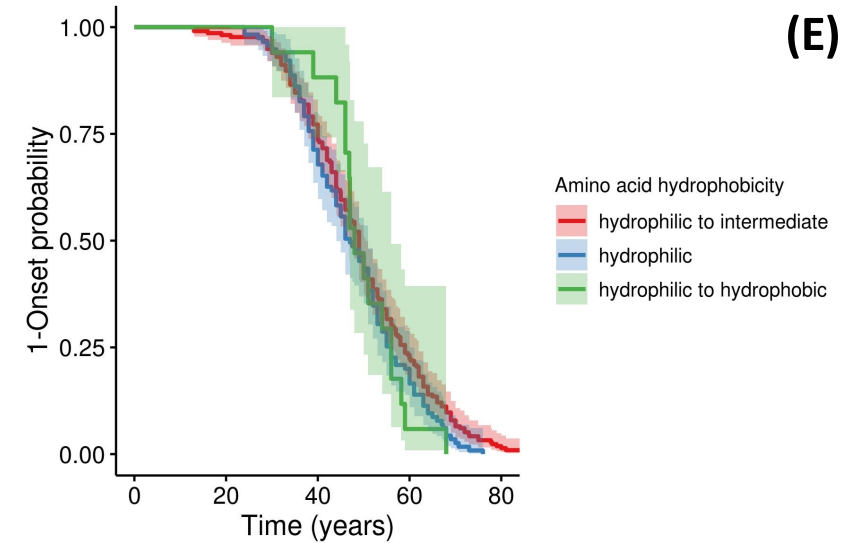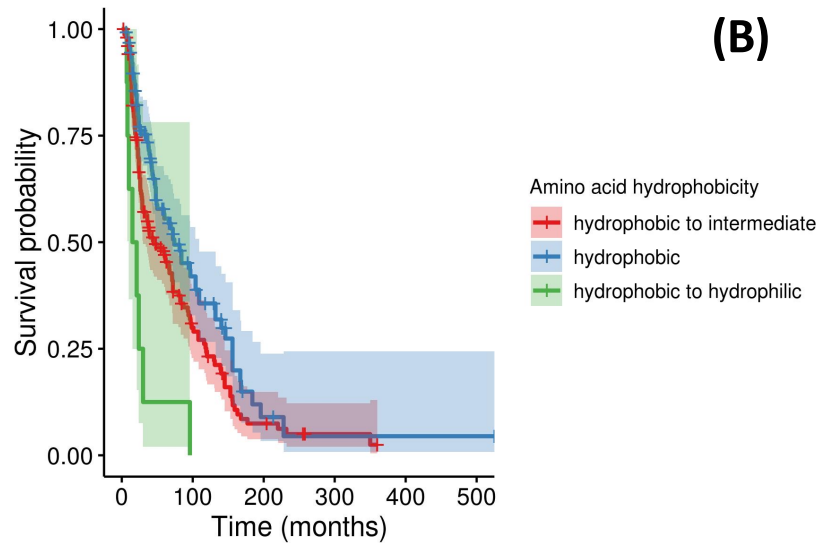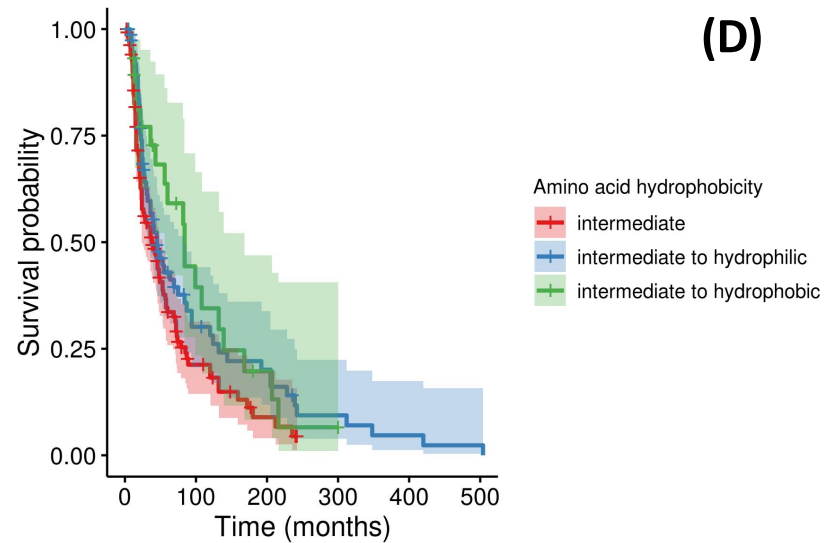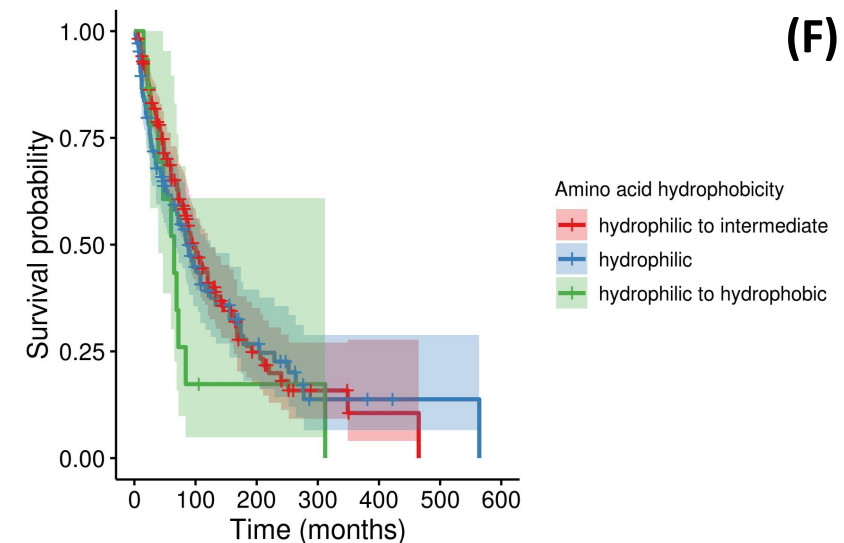

Supplement: Supplementary file [file media-2.pdf]
